# Supplementary material
Source: HighWire-hosted journal article supplement (https://sit.bmj.com/highwire/filestream/336/field_highwire_adjunct_files/6/bmjsit-2021-000088supp007_data_supplement.pdf)

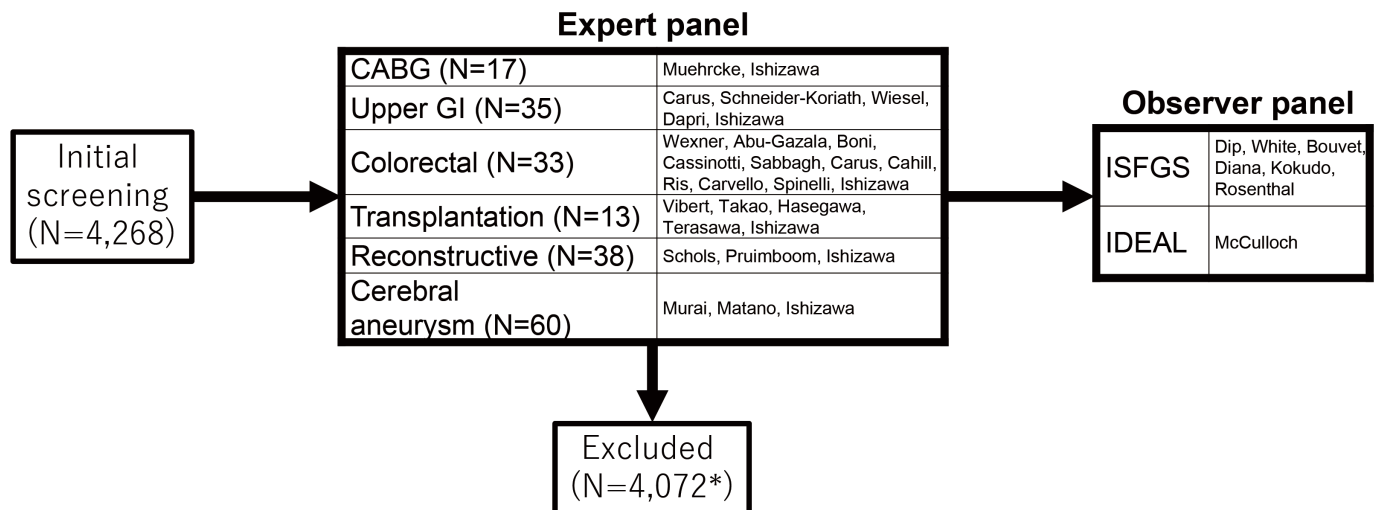

Supplement: bmjsit-2021-000088supp007_data_supplement.pdf [file bmjsit-2021-000088supp007_data_supplement.pdf]
